# Supplementary material for: Sex differences in progression of kidney disease in sickle cell disease
Source: PubMed Central journal article supplement — Haematologica. 2022 Dec 22;108(5):1436–41. doi: 10.3324/haematol.2022.281677 (PMC10153522; doi:10.3324/haematol.2022.281677), 2022-12-22
Supplement: 2022_281677_ATAGA_SUPPL.pdf [file 2022_281677_ATAGA_SUPPL.pdf]

# Sex differences in progression of kidney disease in sickle cell disease

Kenneth I. Ataga,<sup>1</sup> Qingning Zhou,<sup>2</sup> Santosh L. Saraf,<sup>3</sup> Jane S. Hankins,<sup>4</sup> Emily J. Ciccone,<sup>5</sup> Laura R. Loehr,<sup>6</sup> Melanie E. Garrett,<sup>7</sup> Allison E. Ashley-Koch,<sup>7</sup> Jianwen Cai,<sup>8</sup> Marilyn J. Telen<sup>9</sup> and Vimal K. Derebail<sup>10</sup>

<sup>1</sup>Center for Sickle Cell Disease, University of Tennessee Health Science Center, Memphis, TN; <sup>2</sup>Department of Mathematics and Statistics, University of North Carolina at Charlotte, Charlotte, NC; <sup>3</sup>Division of Hematology/Oncology, University of Illinois, Chicago, IL; <sup>4</sup>Department of Hematology, St. Jude Children's Research Hospital, Memphis, TN; <sup>5</sup>Division of Infectious Diseases, University of North Carolina at Chapel Hill, Chapel Hill, NC; <sup>6</sup>Division of General Medicine and Clinical Epidemiology, University of North Carolina at Chapel Hill, Chapel Hill, NC; <sup>7</sup>Duke Molecular Physiology Institute, Duke University Medical Center, Durham, NC; <sup>8</sup>Department of Biostatistics, University of North Carolina at Chapel Hill, Chapel Hill, NC; <sup>9</sup>Division of Hematology, Duke University Medical Center, Durham, NC; <sup>10</sup>UNC Kidney Center, Division of Nephrology and Hypertension, University of North Carolina at Chapel Hill, Chapel Hill, NC, USA

Correspondence:

K.I. ATAGA - [kataga@uthsc.edu](mailto:kataga@uthsc.edu)

<https://doi.org/10.3324/haematol.2022.281677>

**Supplementary Figure 1:** Kaplan-Meier estimates of the survival probabilities for rapid ( $>3.0$  mL/min/1.73m<sup>2</sup> per year) and non-rapid estimated glomerular filtration rate (using CKD-EPI-2009) decline groups for female and male patients. Rapid eGFR decline was significantly associated with age at death in female patients (HR: 4.69, 95%CI: 2.63, 8.37;  $p<0.0001$ ) following adjustment for center, but not in male patients (HR: 1.65, 95%CI: 0.88, 3.07;  $p=0.12$ ).

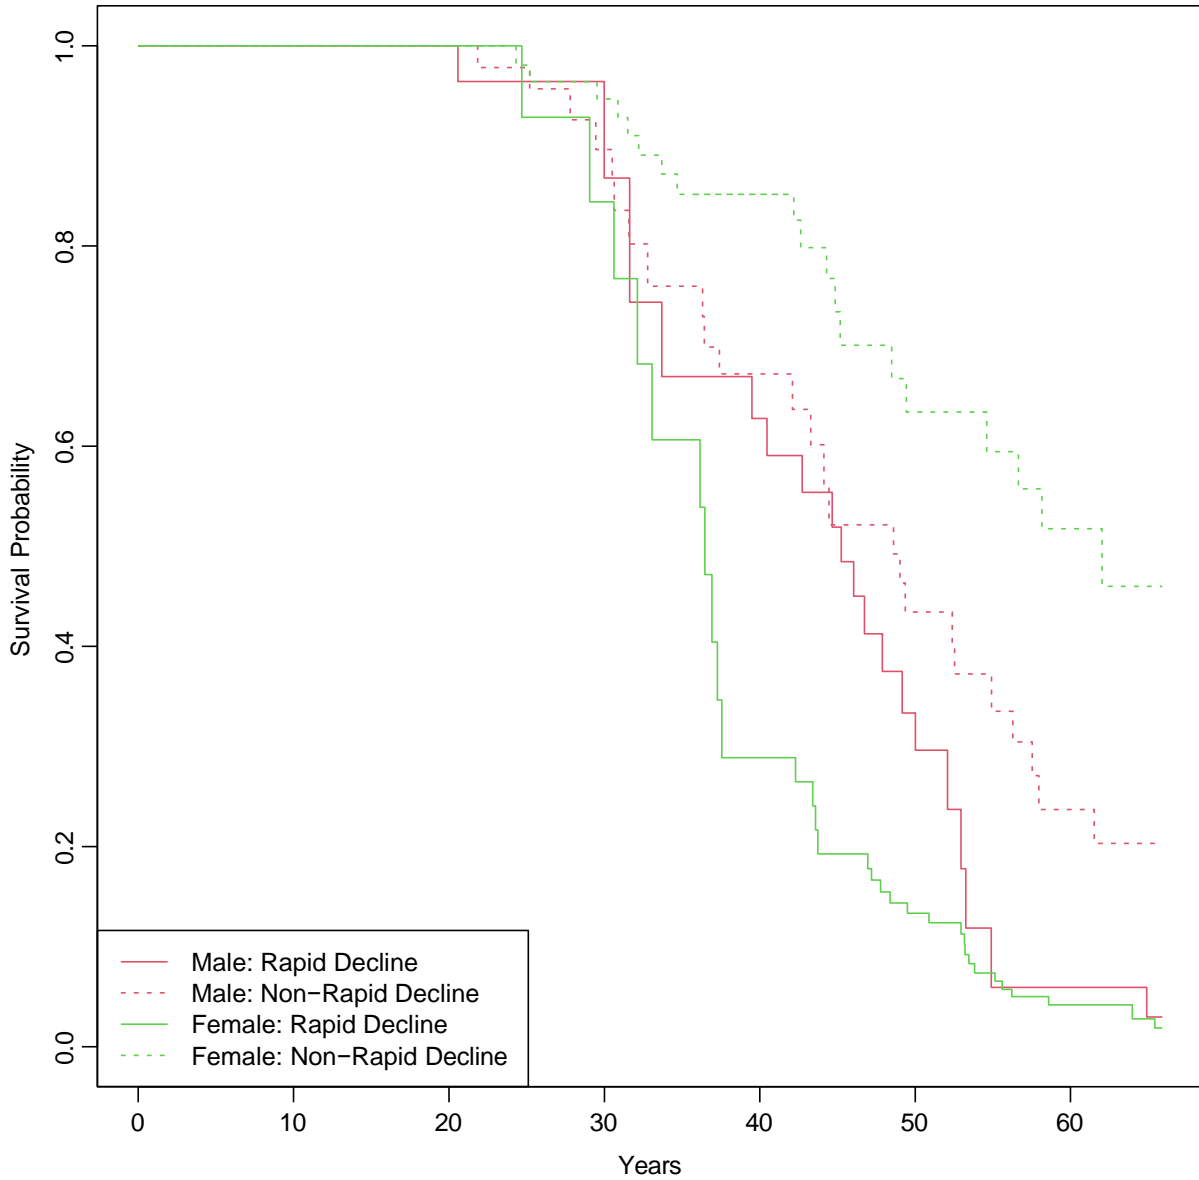

## SUPPLEMENTARY DATA

**Supplementary Table 1: KDIGO eGFR Stage of Patients in the Pooled Analysis**

| <b>G Stage</b>                                                        | <b>CKD-EPI-2009<br/>Number (%)</b> | <b>CKD-EPI-2021<br/>Number (%)</b> |
|-----------------------------------------------------------------------|------------------------------------|------------------------------------|
| No CKD (eGFR >90 mL/min per 1.73 m <sup>2</sup> without proteinuria)  | 526 (75.3)                         | 537 (76.8)                         |
| G1 (eGFR >90 mL/min per 1.73 m <sup>2</sup> with proteinuria)         | 55 (7.9)                           | 56 (8.0)                           |
| G2 (eGFR 60 - 89 mL/min per 1.73 m <sup>2</sup> )                     | 62 (8.9)                           | 52 (7.4)                           |
| G3a (eGFR 45 - 59 mL/min per 1.73 m <sup>2</sup> )                    | 18 (2.6)                           | 19 (2.7)                           |
| G3b (eGFR 30 - 44 mL/min per 1.73 m <sup>2</sup> )                    | 17 (2.4)                           | 16 (2.3)                           |
| G4 (eGFR 15 - 29 mL/min per 1.73 m <sup>2</sup> )                     | 11 (1.6)                           | 9 (1.3)                            |
| G5 (eGFR <15 mL/min per 1.73 m <sup>2</sup> or treatment by dialysis) | 10 (1.4)                           | 10 (1.4)                           |

KDIGO - Kidney Disease Improving Global Outcomes; eGFR - estimated glomerular filtration rate; CKD - Chronic kidney disease  
CKD Epidemiology Collaboration (CKD-EPI) formulae (CKD-EPI-2009 and CKD-EPI-2021) were used to estimate GFR; Race variable was excluded from CKD-2009 equation.
